# Supplementary material
Source: MDPI journal article supplement (https://www.mdpi.com/2073-4352/13/6/980)
Supplement: s1 [file s1]

# Crystal Structure Analysis and Characterization of NADP-Dependent Glutamate Dehydrogenase

with Alcohols Activity from *Geotrichum candidum*

Jing Zhu <sup>1,2#</sup>, Hai Hou <sup>2,3#</sup>, Kun Li <sup>1</sup>, Xiaoguang Xu <sup>2</sup>, Chunmei Jiang <sup>2</sup>, Dongyan Shao <sup>2</sup>,  
Junling Shi <sup>2,\*</sup>, and Dachuan Yin <sup>2,\*</sup>

<sup>1</sup> School of Food Science, Xinyang Agriculture and Forestry University, New 24 Street of Yangshan New District, Xinyang 464000, China; zhujingcy@163.com (J.Z.); likunkm@163.com (K.L.)

<sup>2</sup> Key Laboratory for Space Bioscience and Biotechnology, School of Life Sciences, Northwestern Polytechnical University, 127 Youyi West Road, Xi'an 710072, China; houhai@nwpu.edu.cn (H.H.); xuxiaoguang@mail.nwpu.edu.cn (X.G.X.); jiangcm@nwpu.edu.cn (C.M.J.); shaoyan@nwpu.edu.cn (D.Y.S.)

<sup>3</sup> Institute of Medical Research, Northwestern Polytechnical University, 127 Youyi West Road, Xi'an 710072, China

\* Correspondence: sjlshi2004@nwpu.edu.cn (J.L.S.); yindc@nwpu.edu.cn (D.C.Y.)

# These authors contributed equally to this work .



Fig. S2 Mass spectrum obtained for tryptic peptides eluted from 1-D gel band (Fig. 2a). After a baseline correction, a background subtraction, and peak deisotoping, 17 ions were submitted to Mascot. Twenty one of the submitted ions were matched to theoretical tryptic peptides from glutamate dehydrogenase; the sequences of these peptides are shown next to the mass of the monoisotopic, singly charged ions. The full protein sequence and the sequenced peptides are in red color.

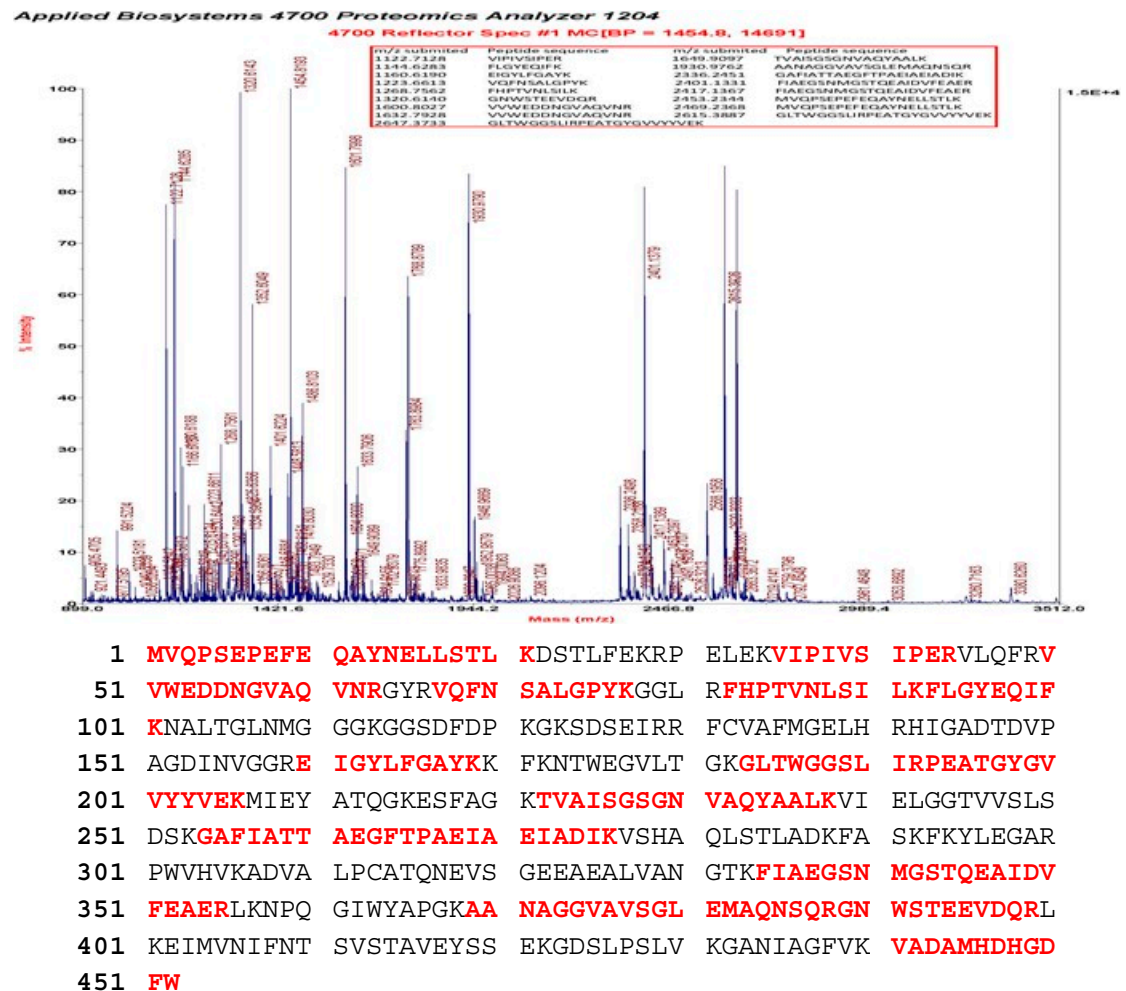

Fig. S3 It showed that the differences of GDHs were more notable when proteins were from different microorganism. All the sequence data were extracted from NCBI database.

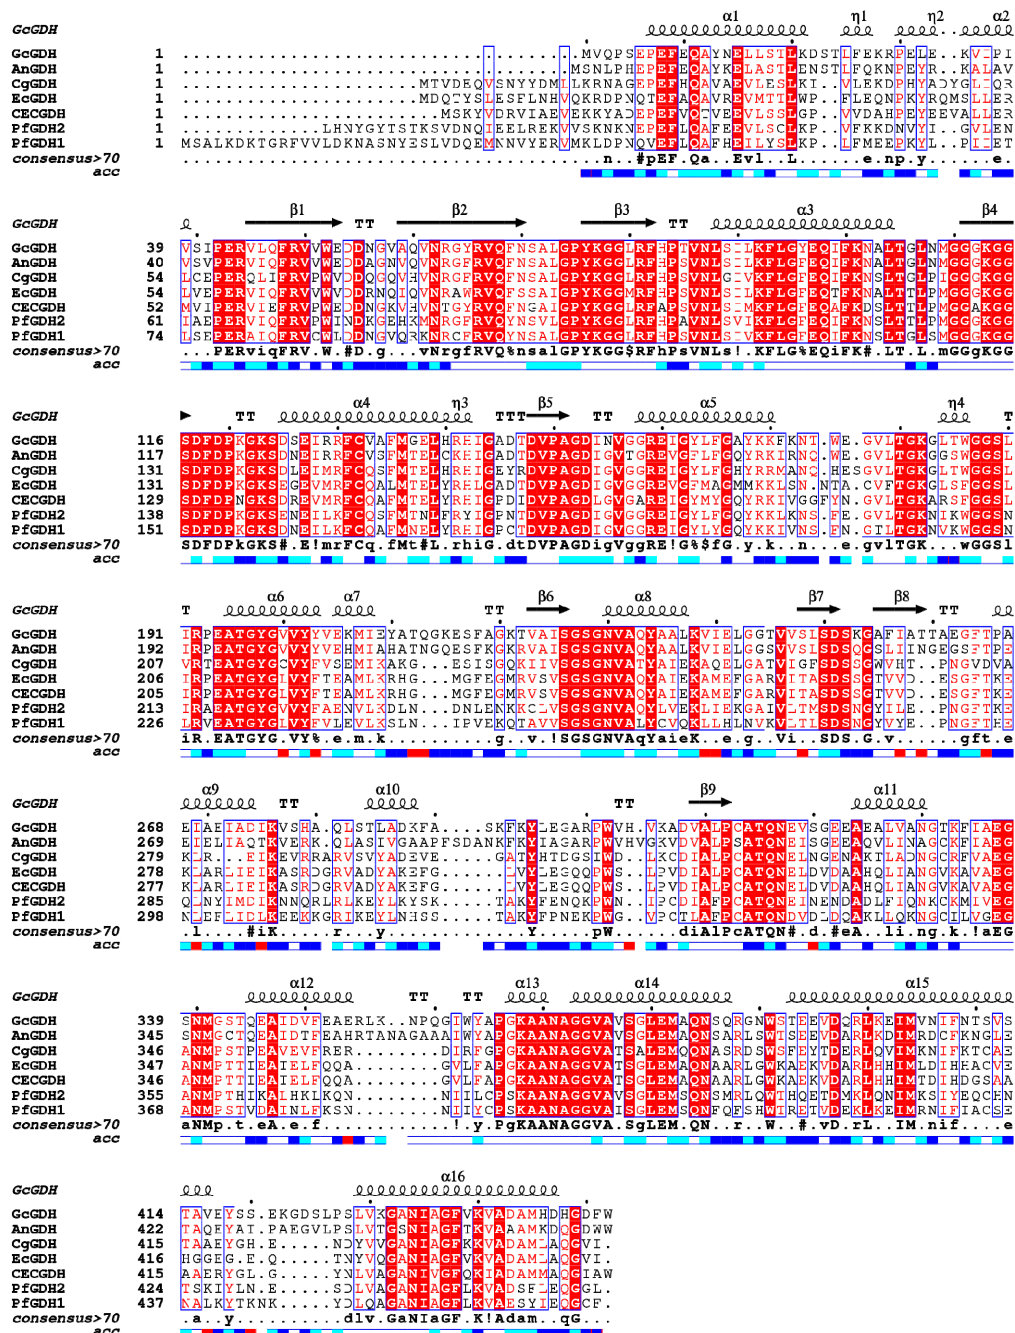

Fig. S4 The results of motif identification determined from the online tool Scanprosite (a) and SDS-PAGE of purified K113Ala ( I ) and K113Gly ( II)(b). M: Protein molecular weight markers; 1, Crude GDH; 2, Flowed crude GDH from Ni column; 3-7, Purification processes (elution buffer containing 10-120 mM imidazole) 8, Purified pET-28as-GDH (elution buffer containing 200 mM imidazole); 5, Arrow mark indicates the target protein.

a

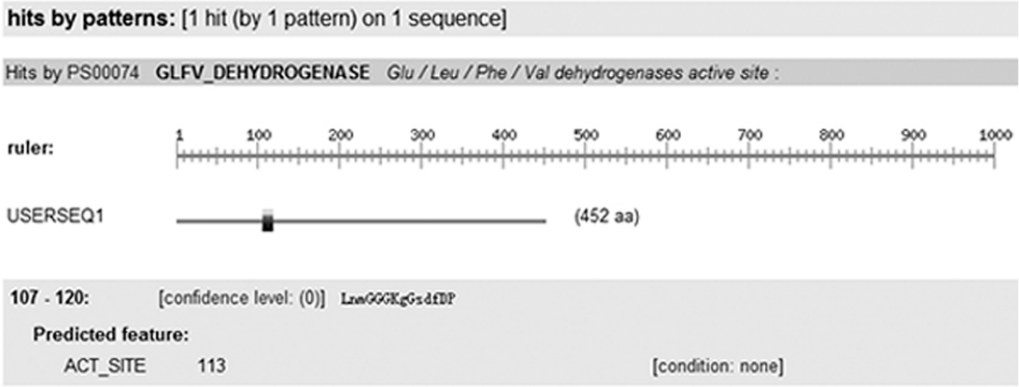

b

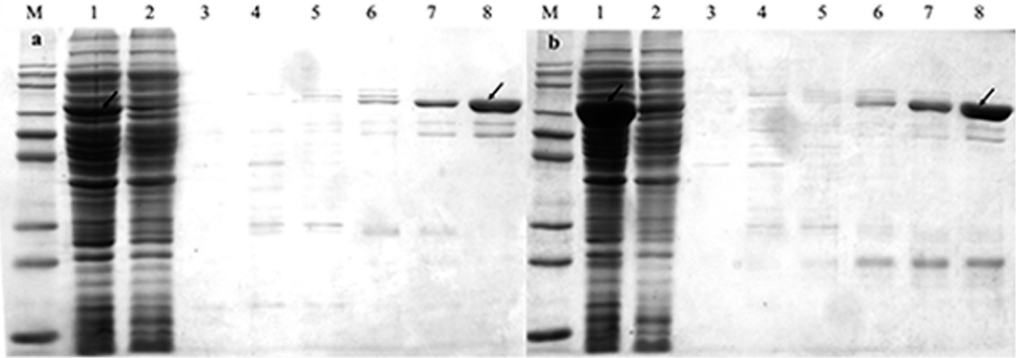

Fig. S5 GC-MS analysis. Total ion chromatograms of the products after GDH treatment using hexanol and isoamyl alcohol.

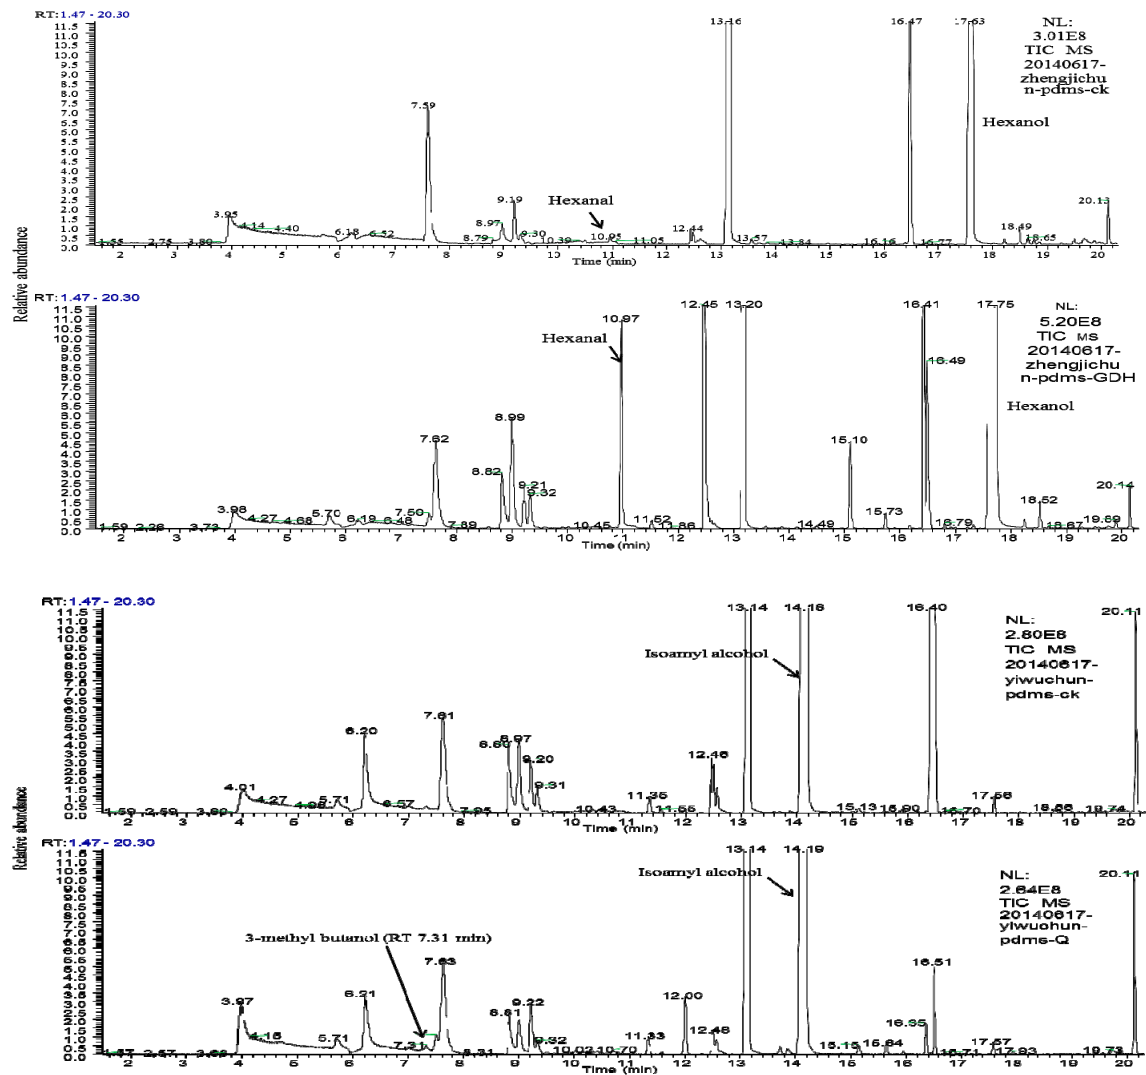

Table S1 List of primers used in the 5' Race. I : verify primers II :linker-adapter, III: 5'Race trans-specific primers.

| Name             | Sequence (5'-3')                        |
|------------------|-----------------------------------------|
| RC75-F ( I )     | GTTGTCTCTCTTTCCGACTCCA                  |
| RC75-R ( I )     | ACGAAACCAGCAATGTTAGCA                   |
| 5'adaptor ( II ) | GCTGTCAACGATACGCTACGTAACGGCATGACAGTGGGG |
| SG-outer ( II )  | GCTGTCAACGATACGCTACGTAAC                |
| SG-inner ( II )  | GCTACGTAACGGCATGACAGTG                  |
| RC75-RT1 (III)   | CAGAGACAGCGACACCACCAGCGTT               |
| RC75-R1 (III)    | GGAACCCATGTTAGAACCCTCGGCAAT             |
| RC75-R2 (III)    | AGCAACATCAGCCTTGACGTGGACCC              |
| RC75-R3 (III)    | CGACGGTCTTGCCAGCGAAGGACTC               |
| RC75-R4 (III)    | GGAACATCGGTATCAGCACCAATGTGTCT           |
| RC75-Fi          | TCAAAACATCAAAATGGTCCAG                  |
